# Supplementary material for: Morphology-dependent electrochemical supercapacitors in multi-dimensional polyaniline nanostructures
Source: Royal Society of Chemistry journal article supplement (doi:10.1039/c7ta03279j), 2017-01-01
Supplement: c7ta03279j1.pdf [file c7ta03279j1.pdf]

Electronic Supplementary Information

**Morphology-Dependent Electrochemical Supercapacitors in Multi-Dimensional Polyaniline Nanostructures**

Yong Ma,<sup>a,b,c</sup> Chunping Hou,<sup>a</sup> Hao Zhang,<sup>a</sup> Mingtao Qiao,<sup>a</sup>

Yanhui Chen,<sup>a</sup> Hepeng Zhang,<sup>a,\*</sup> Qiuyu Zhang,<sup>a,\*</sup> Zhanhu Guo<sup>c,\*</sup>

<sup>a</sup> Key Laboratory of Applied Physics and Chemistry in Space of Ministry of Education, School of Science, Northwestern Polytechnical University, Xi'an 710072, P. R. China

<sup>b</sup> Institute of NanoEngineering, Shandong University of Science and Technology, Qingdao, 266590, P. R. China

<sup>c</sup> Integrated Composites Laboratory (ICL), Department of Chemical & Biomolecular Engineering, University of Tennessee, Knoxville, TN 37996, USA

\* Correspondence author:

E-mail: [zhanghepeng@nwpu.edu.cn](mailto:zhanghepeng@nwpu.edu.cn) (H. Z.),  
[qyzhang@nwpu.edu.cn](mailto:qyzhang@nwpu.edu.cn) (Q. Z.), [zguo10@utk.edu](mailto:zguo10@utk.edu) (Z.G.)

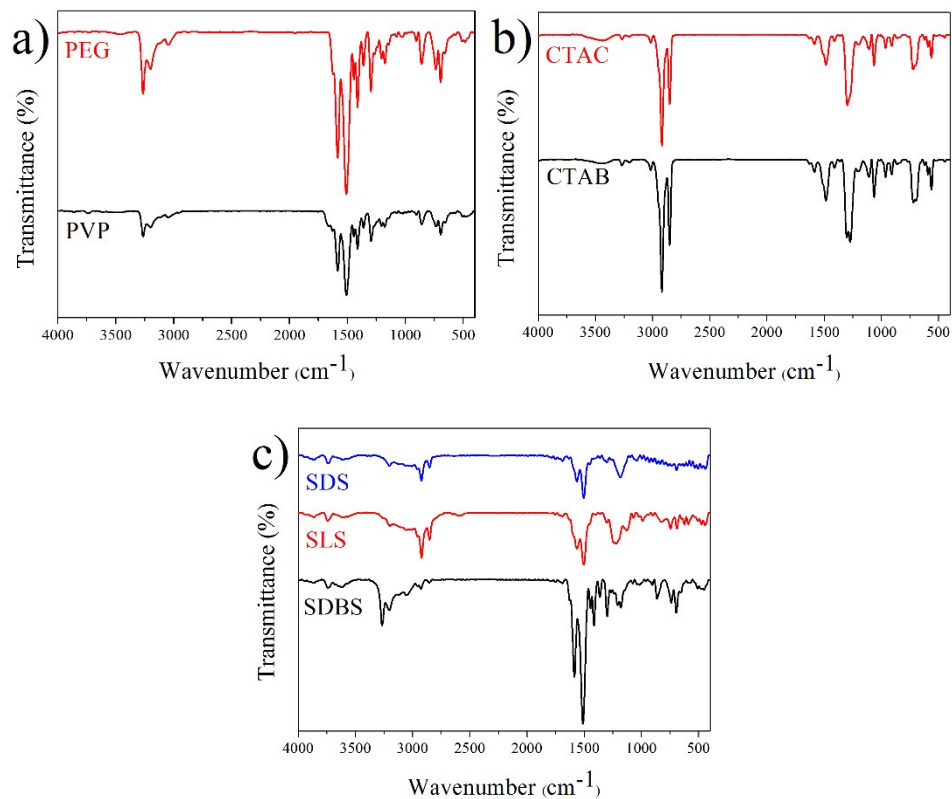

**Fig. S1** FTIR spectra of PANI samples obtained by using **(a)** nonionic surfactants PVP and PEG, **(b)** cationic surfactants CTAB (0.50 g) and CTAC, and **(c)** anionic surfactant SDBS, SLS, and SDS.

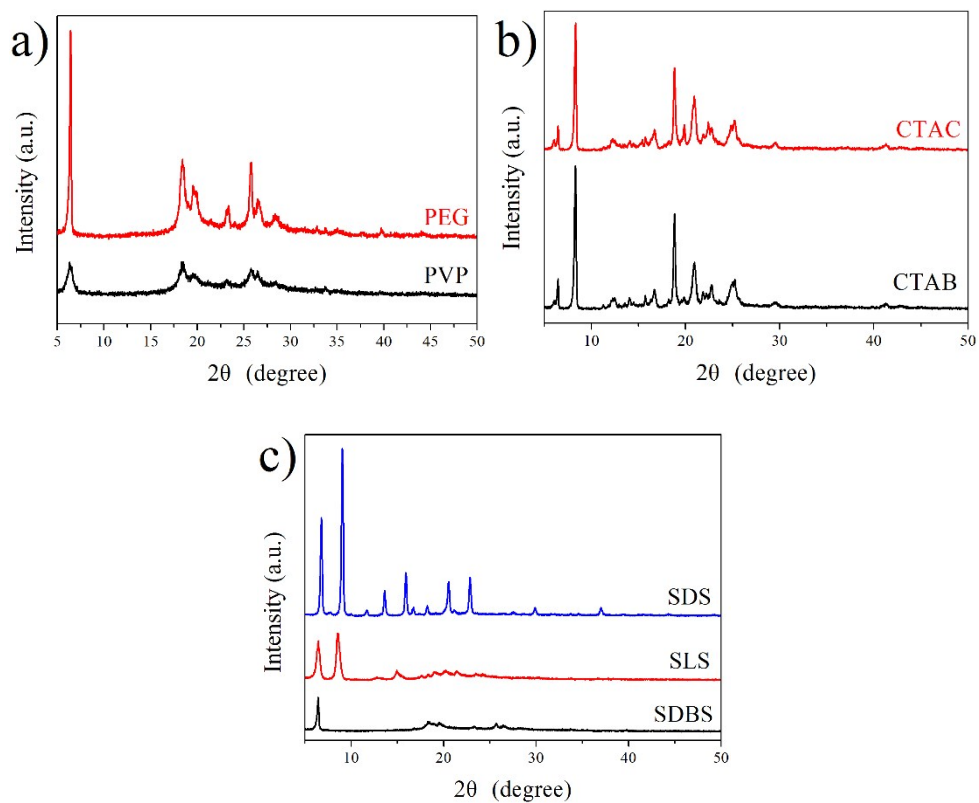

**Fig. S2** XRD patterns of PANI samples obtained by using **(a)** nonionic surfactants PVP and PEG, **(b)** cationic surfactants CTAB (0.50 g) and CTAC, and **(c)** anionic surfactant SDBS, SLS, and SDS.

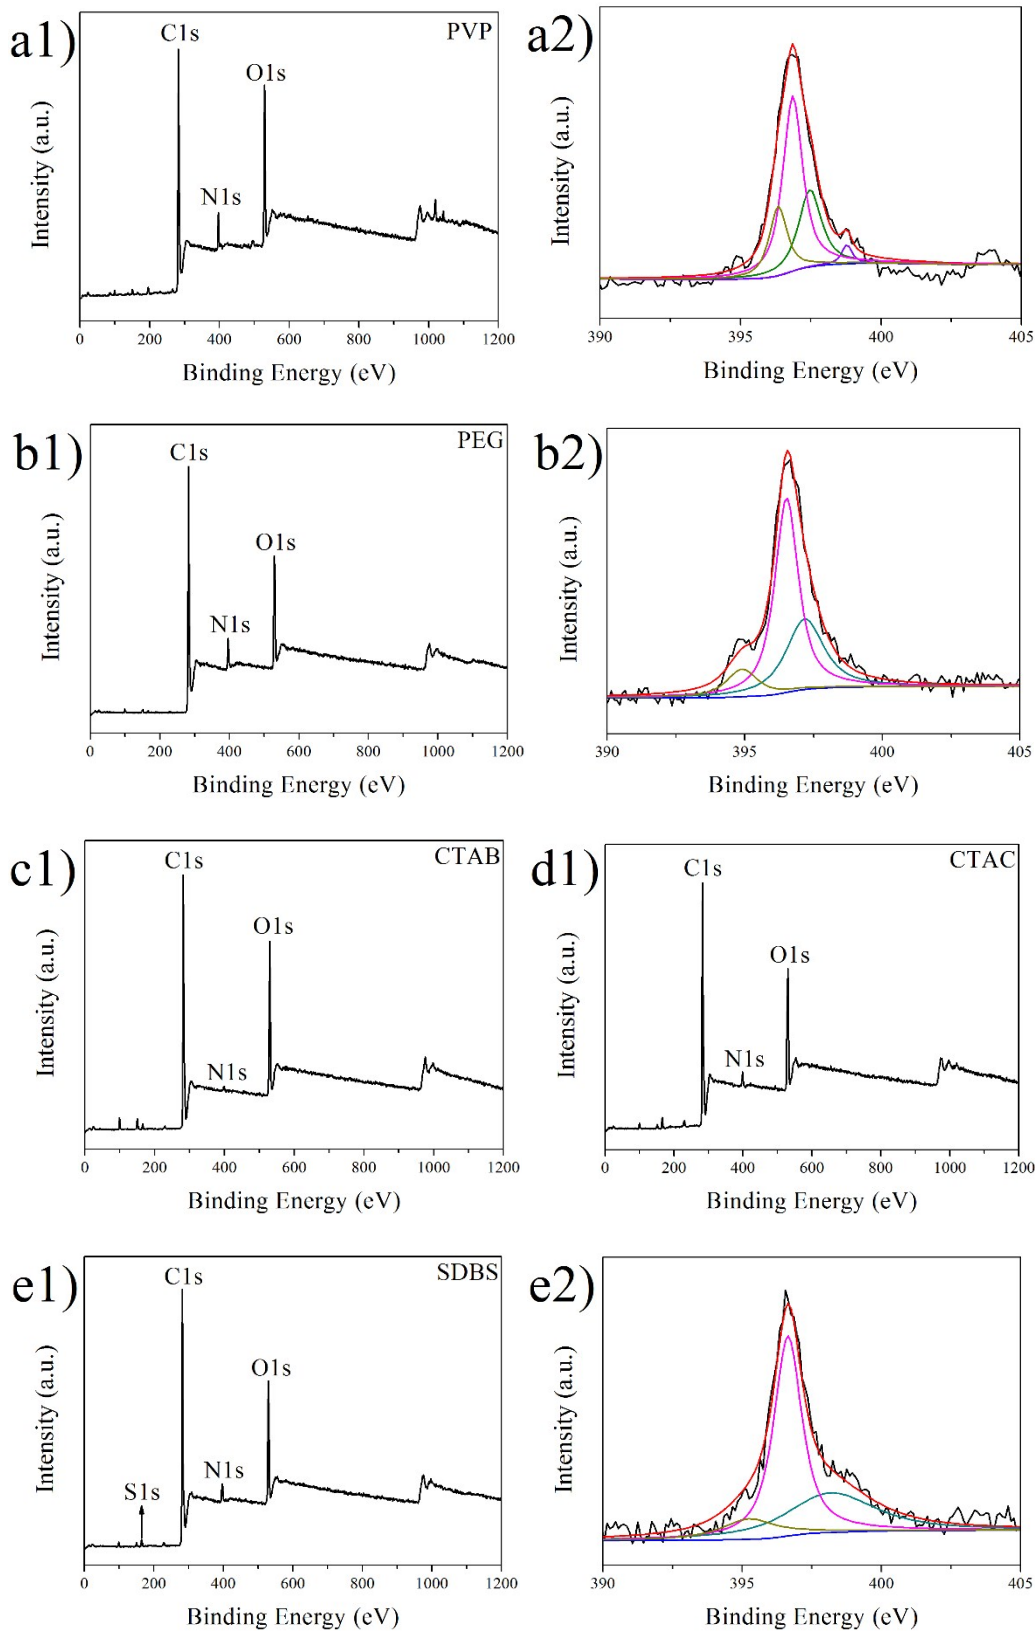

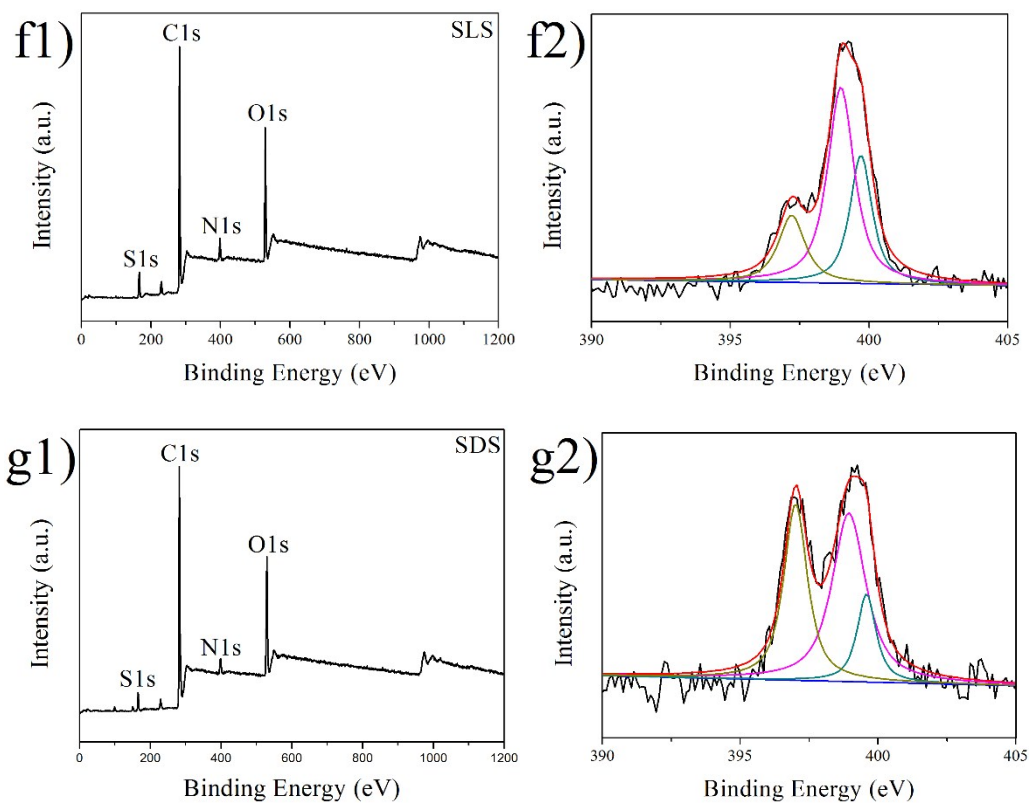

**Fig. S3** XPS spectra of PANI samples obtained by using **(a)** PVP, **(b)** PEG, **(c)** CTAB (0.50 g), **(d)** CTAC, **(e)** SDS, **(f)** SLS, and **(g)** SDBS, along with corresponding N 1s core level spectra.

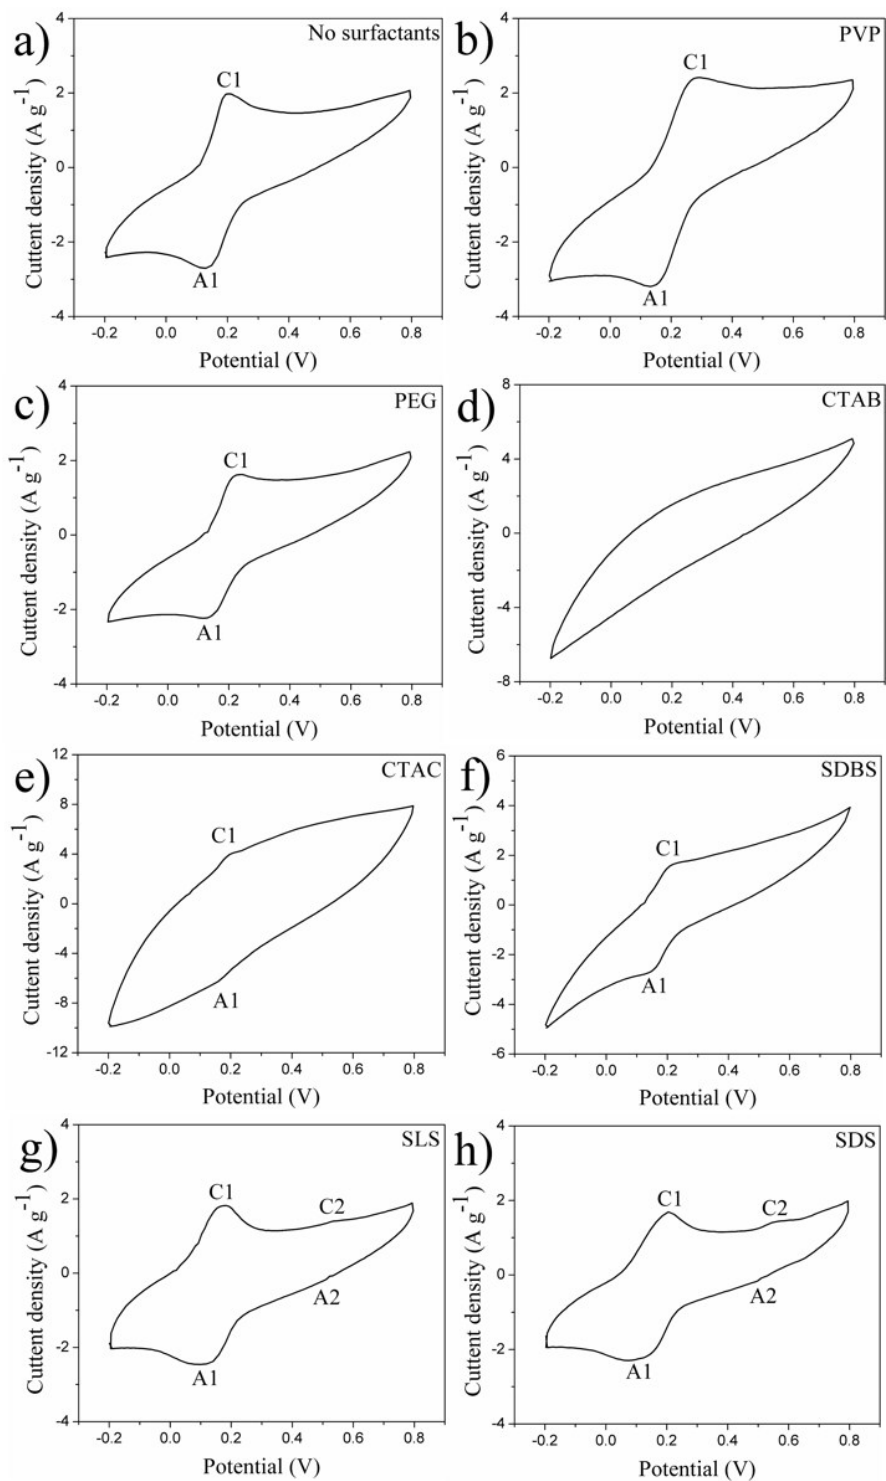

**Fig. S4** CV curves of MD PANI nanostructures prepared in the presence of different surfactants:

(a) no surfactants, (b) PVP, (c) PEG, (d) CTAB (0.50 g), (e) CTAC, (f) SDBS, (g) SLS, (h) SDS.

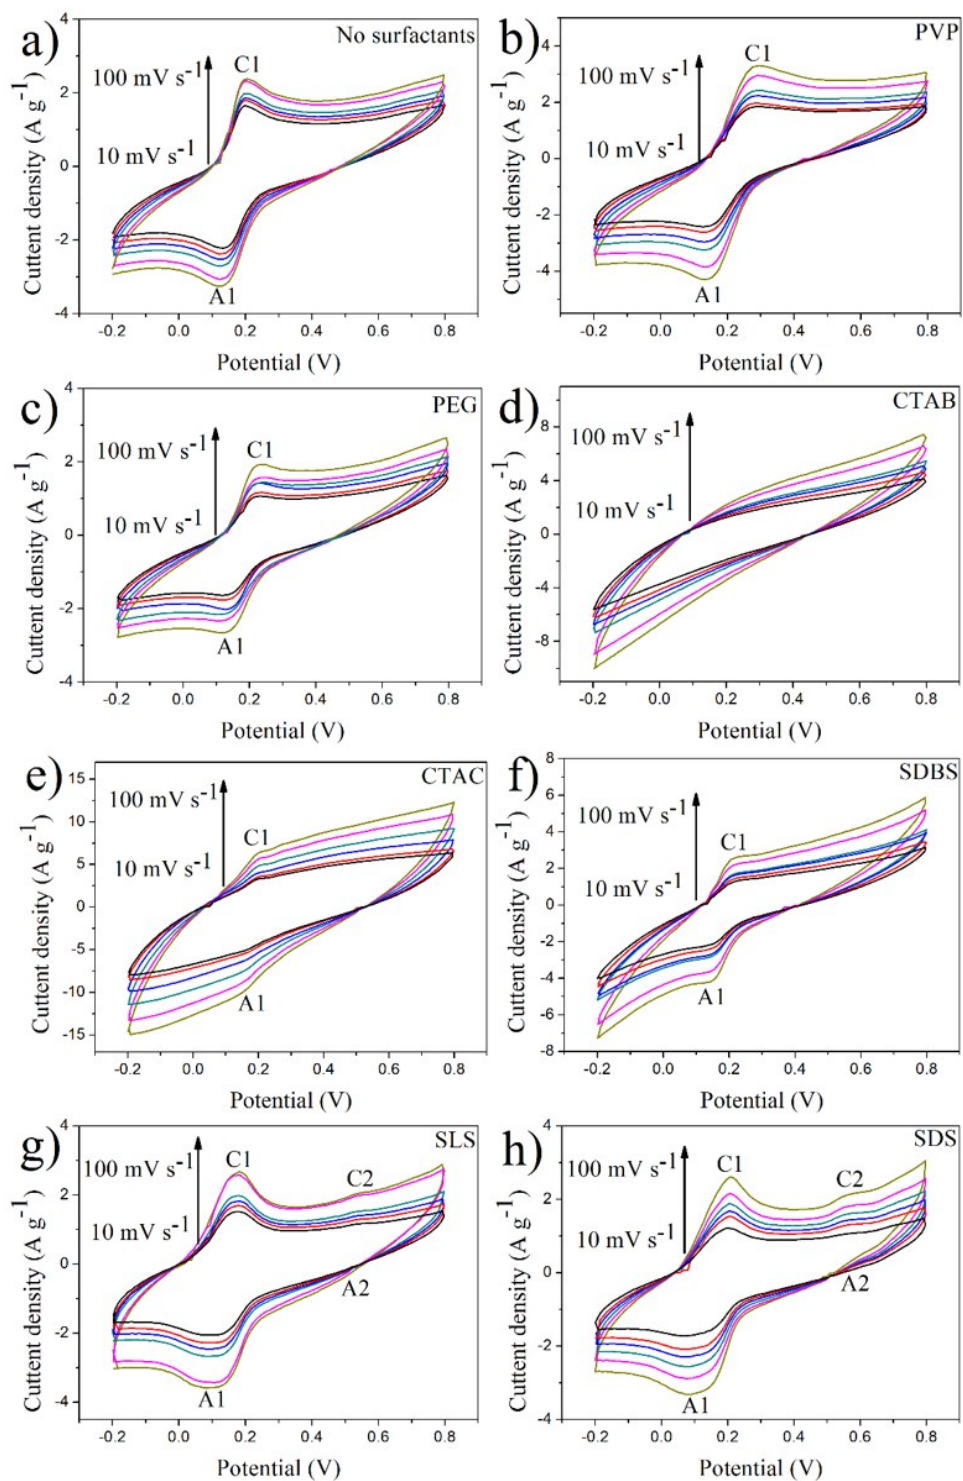

**Fig. S5** CV curves of MD PANI nanostructures prepared in the presence of different surfactants:

(a) no surfactants, (b) PVP, (c) PEG, (d) CTAB (0.50 g), (e) CTAC, (f) SDBS, (g) SLS, (h) SDS

at different scan rates of 10, 20, 40, 60, 80, 100  $\text{mV s}^{-1}$ .

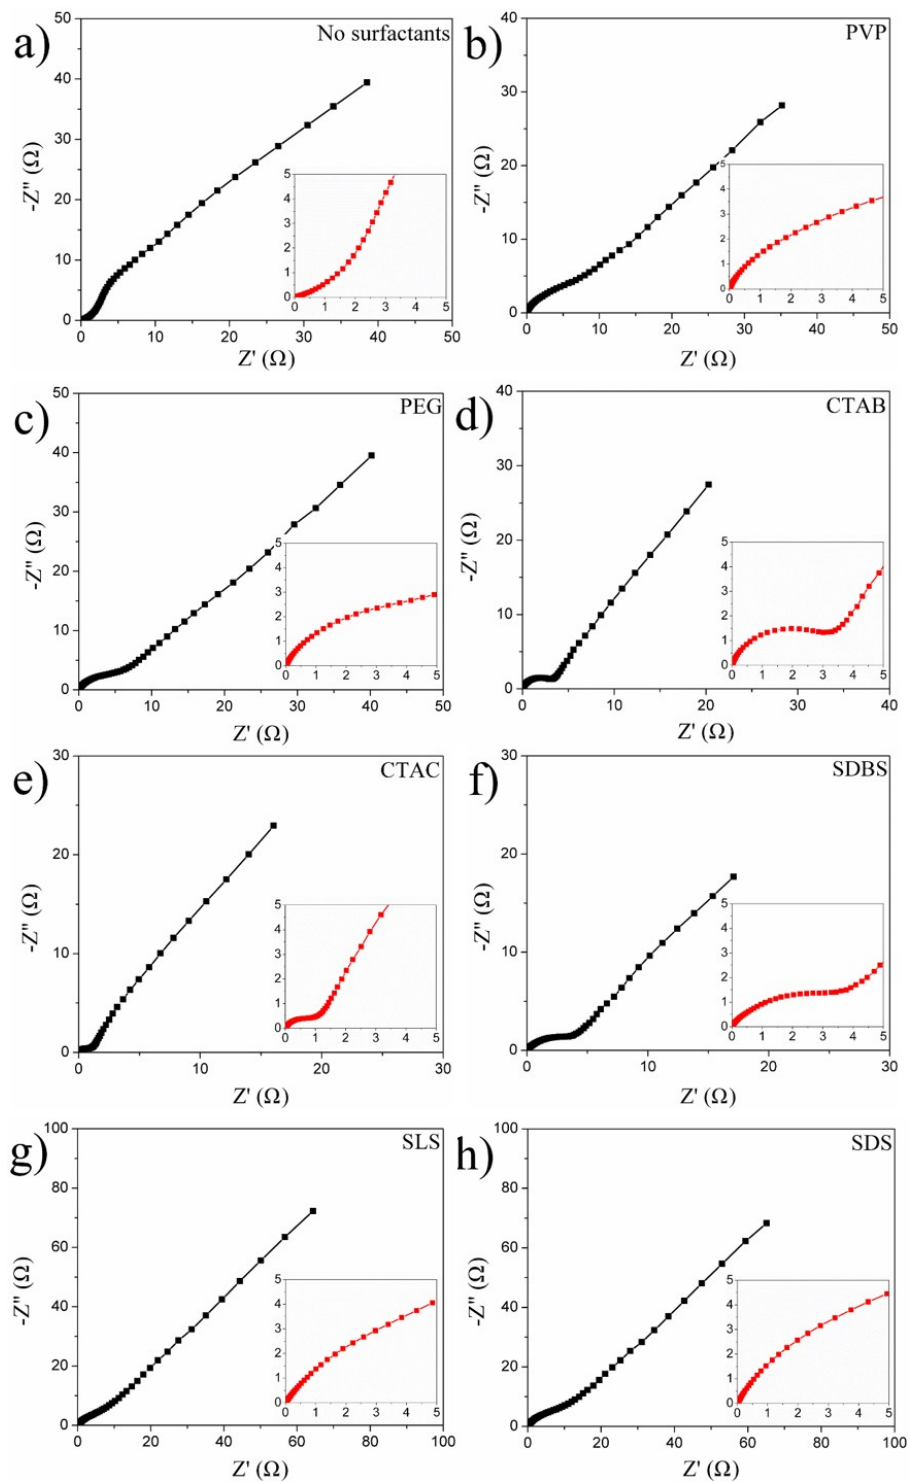

**Fig. S6** Nyquist plots and corresponding enlarging view of MD PANI nanostructures prepared in the presence of different surfactants: **(a)** no surfactant, **(b)** PVP, **(c)** PEG, **(d)** CTAB (0.50 g), **(e)** CTAC, **(f)** SDBS, **(g)** SLS, **(h)** SDS.



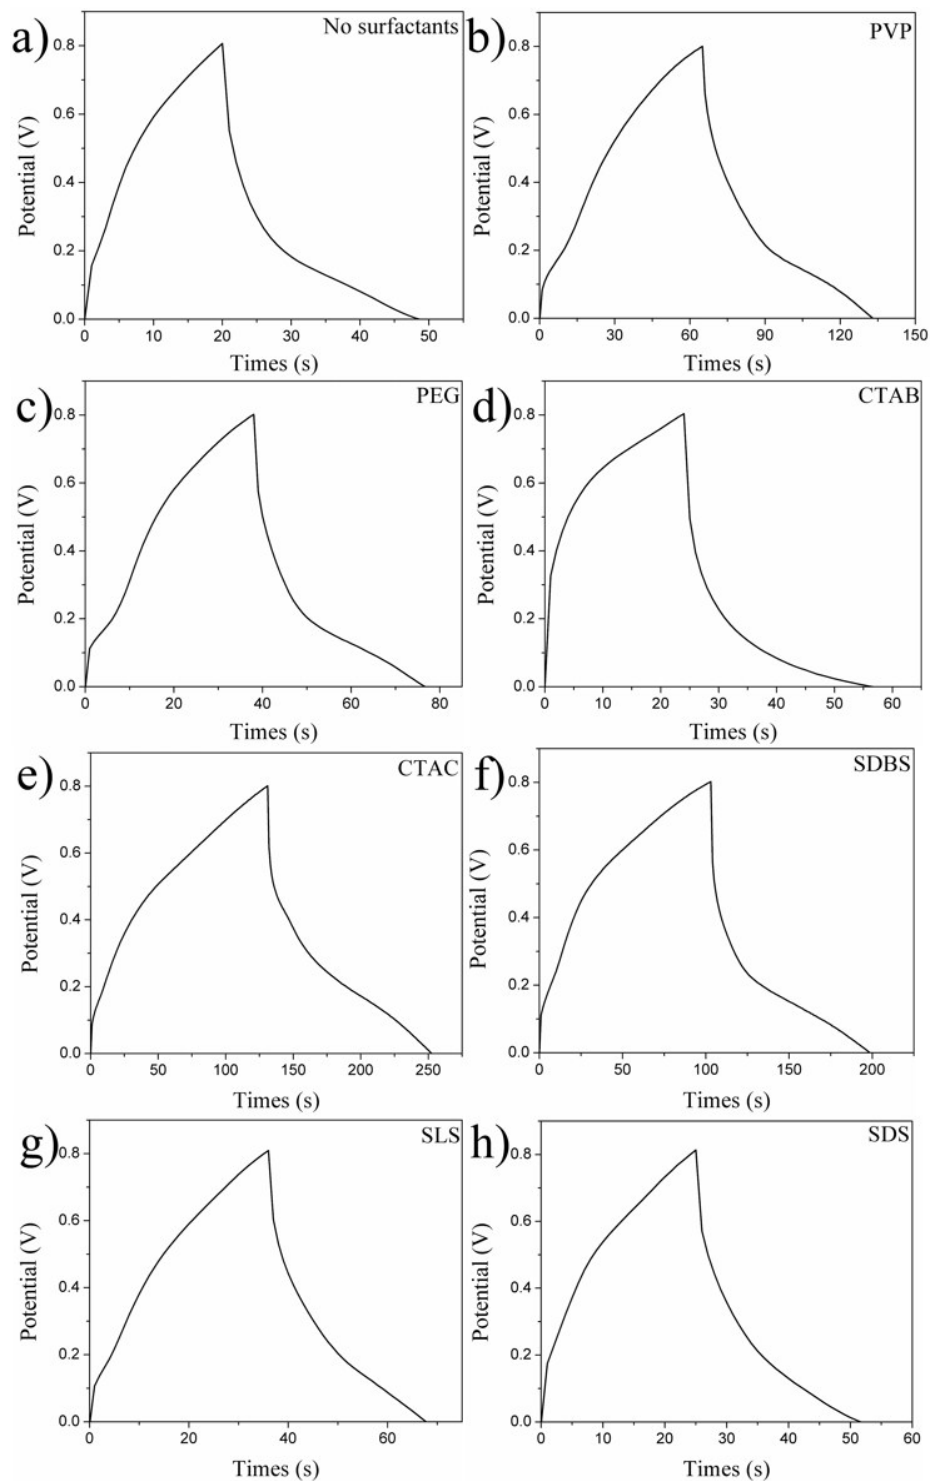

**Fig. S7** Charge and discharge curves of MD PANI nanostructures prepared in the presence of different surfactants: **(a)** no surfactant, **(b)** PVP, **(c)** PEG, **(d)** CTAB (0.50 g), **(e)** CTAC, **(f)** SDBS, **(g)** SLS, **(h)** SDS at a current density of  $2.0 \text{ A g}^{-1}$ .
